# Supplementary material
Source: PubMed Central journal article supplement (PMC8783061)
Supplement: NIHMS1769666-supplement-1.pdf [file NIHMS1769666-supplement-1.pdf]

**Supplementary Table 1.** Cases of Severe Adverse Events

| Case no. | ESD site  | Type of adverse event     | Management                                               | Outcome       |
|----------|-----------|---------------------------|----------------------------------------------------------|---------------|
| 1        | Stomach   | Delayed bleeding          | Endoscopic therapy, blood transfusion, and ICU admission | Full recovery |
| 2        | Esophagus | Perforation               | Endoscopic therapy and hospitalization >10 nights        | Full recovery |
| 3        | Colon     | Delayed bleeding          | Blood transfusion and ICU admission                      | Full recovery |
| 4        | Colon     | Delayed bleeding          | Endoscopic therapy, blood transfusion, and ICU admission | Full recovery |
| 5        | Colon     | Perforation               | Endoscopic therapy, antibiotics, and ICU admission       | Full recovery |
| 6        | Colon     | Aspiration with pneumonia | Antibiotics and ICU admission                            | Full recovery |
| 7        | Colon     | Perforation               | Right hemicolectomy                                      | Full recovery |

ICU, intensive care unit.

**Supplementary Table 2.** Cases of Recurrence on Surveillance Endoscopy

| Case no. | Age, y | Lesion size, mm | ESD site  | Histopathology                                              | Additional intervention(s)                | Follow-up, mo |
|----------|--------|-----------------|-----------|-------------------------------------------------------------|-------------------------------------------|---------------|
| 1        | 64     | 27 × 12         | Esophagus | Nondysplastic BE                                            | Endoscopic ablation residual BE           | 38            |
| 2        | 75     | 25 × 20         | Esophagus | Poorly differentiated invasive adenocarcinoma, LVI-         | Surgery                                   | 4             |
| 3        | 78     | 110 × 60        | Esophagus | Well-differentiated invasive adenocarcinoma, LVI-           | No further treatment due to comorbidities | 22            |
| 4        | 68     | 26 × 17         | Esophagus | Intramucosal adenocarcinoma, LVI-                           | Patient declined further treatment        | 11            |
| 5        | 72     | 48 × 46         | Esophagus | Poorly differentiated invasive adenocarcinoma, LVI-         | Chemoradiation                            | 9             |
| 6        | 94     | 86 × 58         | Esophagus | Moderately differentiated intramucosal adenocarcinoma, LVI- | No further treatment due to comorbidities | 4             |
| 7        | 70     | 34 × 28         | Esophagus | Moderately differentiated invasive adenocarcinoma, LVI-     | Patient declined further treatment        | 10            |
| 8        | 76     | 31 × 24         | Esophagus | Intramucosal adenocarcinoma, LVI-                           | Surveillance                              | 3             |
| 9        | 71     | 34 × 24         | Esophagus | Invasive adenocarcinoma, LVI-                               | Patient declined further treatment        | 37            |
| 10       | 71     | 40 × 32         | Esophagus | Adenoma with HGD                                            | Endoscopic resection                      | 19            |
| 11       | 67     | 57 × 51         | Esophagus | Poorly differentiated intramucosal adenocarcinoma, LVI+     | Radiation therapy                         | 6             |
| 12       | 71     | 64 × 52         | Esophagus | Well differentiated intramucosal adenocarcinoma, LVI-       | Patient declined further treatment        | 4             |
| 13       | 75     | 45 × 45         | Esophagus | Adenoma with HGD                                            | Endoscopic resection                      | 8             |
| 14       | 37     | 31 × 25         | Stomach   | Hyperplastic tissue without dysplasia                       | Endoscopic resection                      | 7             |
| 15       | 58     | 41 × 31         | Stomach   | Intramucosal adenocarcinoma, LVI-                           | Surveillance                              | 19            |
| 16       | 74     | 40 × 35         | Stomach   | Adenoma with low-grade dysplasia                            | Surveillance                              | 16            |
| 17       | 87     | 30 × 24         | Stomach   | Adenoma with HGD                                            | No further treatment due to comorbidities | 6             |
| 18       | 53     | 20 × 12         | Stomach   | Pancreatic heterotopia                                      | No further treatment                      | 6             |
| 19       | 68     | 55 × 33         | Stomach   | Hyperplastic tissue without dysplasia                       | No further treatment                      | 10            |
| 20       | 71     | 40 × 40         | Stomach   | Hyperplastic tissue without dysplasia                       | No further treatment                      | 2             |
| 21       | 71     | 50 × 50         | Stomach   | Hyperplastic tissue without dysplasia                       | No further treatment                      | 7             |
| 22       | 51     | 58 × 38         | Stomach   | Well-differentiated intramucosal adenocarcinoma, LVI-       | Endoscopic full-thickness resection       | 19            |
| 23       | 65     | 11 × 10         | Duodenum  | Well-differentiated carcinoid                               | Chemotherapy                              | 33            |
| 24       | 74     | 45 × 44         | Colon     | Well-differentiated invasive adenocarcinoma, LVI-           | Patient declined further treatment        | 37            |
| 25       | 65     | 60 × 50         | Colon     | Tubular adenoma                                             | Endoscopic resection                      | 3             |
| 26       | 86     | 110 × 100       | Colon     | Tubular adenoma with HGD                                    | Patient declined further treatment        | 20            |
| 27       | 50     | 20 × 18         | Colon     | Sessile serrated adenoma                                    | Endoscopic resection                      | 19            |
| 28       | 64     | 34 × 22         | Colon     | Tubulovillous adenoma                                       | Endoscopic resection                      | 11            |
| 29       | 64     | 26 × 25         | Colon     | Tubular adenoma                                             | Patient lost to follow-up for treatment   | 6             |
| 30       | 77     | 48 × 42         | Colon     | Tubular adenoma                                             | Right hemicolectomy for cecal volvulus    | 11            |
| 31       | 81     | 105 × 84        | Colon     | Tubular adenoma with HGD                                    | Patient declined further treatment        | 5             |

BE, Barrett's esophagus; HGD, high-grade dysplasia; LVI, lymphovascular invasion.
